# Supplementary material
Source: PubMed Central journal article supplement (PMC2708743)
Supplement: 0903941106_0903941106SI.pdf [file 0903941106_0903941106SI.pdf]

# Supporting Information

Shulman et al. 10.1073/pnas.0903941106

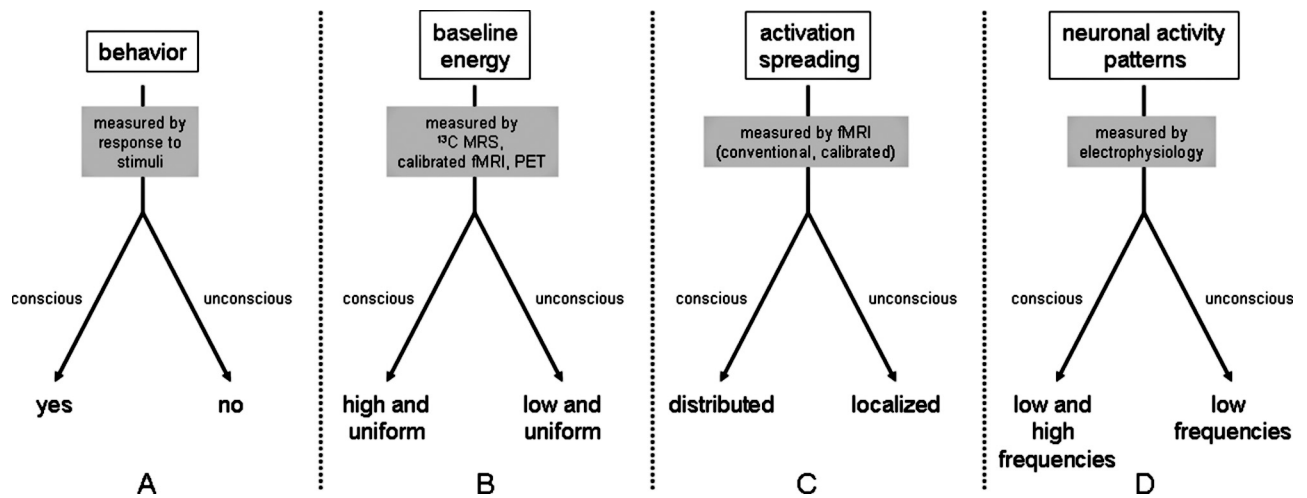

**Fig. S1.** Measurable properties for studying consciousness and its loss. (A) Behavioral output measured by response to stimuli. (B) Brain property of baseline energy measured by neurophysiological methods like <sup>13</sup>C magnetic resonance spectroscopy (MRS), calibrated fMRI, and PET. (C) Brain property of activation spreading measured by fMRI, both conventional and calibrated. (D) Brain property of neuronal activity patterns measured by electrophysiology.

**Table S1. Anesthesia-induced decrease in glucose metabolism measured by PET**

| Area               | $\Delta\text{CMR}_{\text{O}_2}$<br>Sevoflurane, % (1) | $\Delta\text{CMR}_{\text{O}_2}$<br>Propofol, % (1) | $\Delta\text{CMR}_{\text{O}_2}$<br>Propofol, % (2) | $\Delta\text{CMR}_{\text{O}_2}$<br>Halothane, % (3) | $\Delta\text{CMR}_{\text{O}_2}$<br>Isoflurane, % (3) |
|--------------------|-------------------------------------------------------|----------------------------------------------------|----------------------------------------------------|-----------------------------------------------------|------------------------------------------------------|
| Frontal cortex     | 29                                                    | 38                                                 | 58                                                 | 47                                                  | 52                                                   |
| Parietal cortex    | 31                                                    | 42                                                 | 53                                                 | 41                                                  | 55                                                   |
| Temporal cortex    | 26                                                    | 36                                                 | 52                                                 | 48                                                  | 47                                                   |
| Occipital cortex   | 43                                                    | 50                                                 | 59                                                 | 50                                                  | 40                                                   |
| Anterior cingulate | —                                                     | —                                                  | 53                                                 | 46                                                  | 48                                                   |
| Caudate            | 30                                                    | 33                                                 | —                                                  | —                                                   | —                                                    |
| Putamen            | 31                                                    | 32                                                 | —                                                  | —                                                   | —                                                    |
| Thalamus           | 41                                                    | 43                                                 | 55                                                 | 52                                                  | 53                                                   |
| Basal ganglia      | —                                                     | —                                                  | 52                                                 | 48                                                  | 44                                                   |
| Hippocampus        | —                                                     | —                                                  | 42                                                 | 50                                                  | 45                                                   |
| Midbrain           | —                                                     | —                                                  | 44                                                 | 54                                                  | 50                                                   |
| Cerebellum         | 44                                                    | 43                                                 | 56                                                 | 54                                                  | 55                                                   |

Values for anesthesia-induced decrease in metabolism were approximations made from graphical representations of data in the original papers (1–3). Decreased metabolism in whole brain, neocortex, and subcortex were 40–50%, 45–50%, and 35–45%, respectively. Therefore, brain metabolism of gray matter regions in anesthetized humans is uniformly suppressed.

1. Kaisti KK, et al. (2003) Effects of sevoflurane, propofol, and adjunct nitrous oxide on regional cerebral blood flow, oxygen consumption, and blood volume in humans. *Anesthesiology* 99:603–613.
2. Alkire MT, et al. (1995) Cerebral metabolism during propofol anesthesia in humans studied with positron emission tomography. *Anesthesiology* 82:393–403; discussion 327A.
3. Alkire MT, et al. (1999) Functional brain imaging during anesthesia in humans: Effects of halothane on global and regional cerebral glucose metabolism. *Anesthesiology* 90:701–709.

**Table S2. Awake values of glucose metabolism measured by PET**

| Area               | Awake $CMR_{glc}$ $\mu\text{mol/g/min}$ |
|--------------------|-----------------------------------------|
| Frontal cortex     | $0.39 \pm 0.05$                         |
| Parietal cortex    | $0.37 \pm 0.01$                         |
| Temporal cortex    | $0.35 \pm 0.07$                         |
| Occipital cortex   | $0.37 \pm 0.04$                         |
| Anterior cingulate | $0.34 \pm 0.01$                         |
| Caudate            | $0.32 \pm 0.06^*$                       |
| Putamen            | $0.40 \pm 0.07^*$                       |
| Thalamus           | $0.34 \pm 0.01$                         |
| Basal ganglia      | $0.36 \pm 0.03$                         |
| Hippocampus        | $0.29 \pm 0.08$                         |
| Midbrain           | $0.15 \pm 0.01$                         |
| Cerebellum         | $0.26 \pm 0.06$                         |

Awake  $CMR_{glc}$  values show that the average of the whole brain ( $0.33 \pm 0.04 \mu\text{mol/g/min}$ ) is within 10 and 3% of the gray matter regions in the neocortex ( $0.36 \pm 0.03 \mu\text{mol/g/min}$ ) and subcortex ( $0.34 \pm 0.05 \mu\text{mol/g/min}$ ), respectively. Therefore, brain metabolism of gray matter regions in the awake human is quite high and uniform. Awake  $CMR_{glc}$  values were mainly derived from averaged value in refs. 1 and 2, except for caudate and putamen.

\*Awake  $CMR_{glc}$  values were derived from  $CMR_{O_2}$  values in ref. 3.

1. Alkire MT, et al. (1995) Cerebral metabolism during propofol anesthesia in humans studied with positron emission tomography. *Anesthesiology* 82:393–403; discussion 327A.
2. Alkire MT, et al. (1999) Functional brain imaging during anesthesia in humans: Effects of halothane on global and regional cerebral glucose metabolism. *Anesthesiology* 90:701–709.
3. Kaisti KK, et al. (2003) Effects of sevoflurane, propofol, and adjunct nitrous oxide on regional cerebral blood flow, oxygen consumption, and blood volume in humans. *Anesthesiology* 99:603–613.
